# Supplementary material for: Precise Generation of Conformational Ensembles for Intrinsically Disordered Proteins via Fine-tuned Diffusion Models
Source: Research Square preprint supplement (doi:10.21203/rs.3.rs-4489551/v1), 2024-07-15
Supplement: Supplementary file 1 [file 4e4dc293212d4c7faf3663b4.docx]

Supporting Information

Precise Generation of Conformational Ensembles for Intrinsically Disordered Proteins *via* Fine-tuned Diffusion Models

Junjie Zhu1,#, Zhengxin Li1,#, Zhuoqi Zheng1, Bo Zhang1, Bozitao Zhong1, Jie Bai1, Taifeng Wang2,*, Ting Wei1,*, Jianyi Yang3,*, Hai-Feng Chen1,*

1State Key Laboratory of Microbial Metabolism, Department of Bioinformatics and Biostatistics, SJTU-Yale Joint Center for Biostatistics, National Experimental Teaching Center for Life Sciences and Biotechnology, School of Life Sciences and Biotechnology, Shanghai Jiao Tong University, 200240, Shanghai, China.

2BioMap,10 Beilun Industrial Park, Yongteng North Road, 100080, Beijing, China.

3MOE Frontiers Science Center for Nonlinear Expectations, Research Center for Mathematics and Interdisciplinary Sciences, Shandong University, 266237, Qingdao, China.

***Corresponding Author**

**Email**: haifengchen@sjtu.edu.cn; [yangjy@sdu.edu.cn](mailto:yangjy@sdu.edu.cn); weitinging@sjtu.edu.cn; taifeng@biomap.com

**Notes**

The authors declare that there is no conflict of interest.

**Author Contributions**

#These authors contributed equally to this work.

**Table S1.** IDP systems in test set, and experimental chemical shifts. Abbreviated forms of long system names are marked in bold.

| **System** |  | **Chemical Shift** |
| --- | --- | --- |
| Sic1 | 34.71 | chemical shifts1 |
| Aβ 42 | 12.42 | chemical shifts3 |
| Aβ 40 | 124 | chemical shifts3 |
| RS1 | 12.625 | chemical shifts6 |
| Histatin5 | 13.87 | N/A |
| p15PAF | 28.18 | chemical shifts8 |
| FEZ1 monomer | 369 | N/A |
| HIV-1 Tat133 | 3310 | N/A |
| R17 | 22.911 | N/A |
| PIR domain | 26.512 | N/A |
| IB5 | 27.913 | N/A |
| PaaA2 | 22.414 | chemical shifts14 |
| ACTR | 2515 | chemical shifts16 |
| drkN SH3 | 16.717 | chemical shifts18 |
| Juxtanodin | 55.919 | N/A |
| α Synuclein | 3320 | chemical shifts21 |
| β Synuclein | 4922 | N/A |
| γ Synuclein | 6122 | N/A |
| Tau K18 | 3823 | N/A |
| Tau K19 | 3523 | N/A |
| Prothymosin α | 37.824 | N/A |
| p53 (1-93) **[p53]** | 28.725 | chemical shifts25 |
| Human NCBD domain **[NCBD]** | 3326 | N/A |
| Human Calpastatin (137-237) **[Calpastatin]** | 3926 | N/A |
| N-term NRG1 type III **[NtermNRG1]** | 26.827 | N/A |
| N-term VS Virus phosphoprotein  **[NtermVS]** | 2628 | N/A |
| E3 ubiquitin ligase RNF4 (32-82)  **[RNF4]** | 25.829 | N/A |

**Table S2.** Performance of all 8 versions of AlphaFlow.

| **Methods** | **Validity (↑)** | **Fidelity** | |
| --- | --- | --- | --- |
|  |  |  | (↓) |
| AF-PDB-base | **0.97** |  | **0.54** |
| AF-PDB-distilled | 0.91 |  | 0.78 |
| AF-MD-base | 0.94 |  | **0.54** |
| AF-MD-distilled | 0.91 |  | 0.66 |
| ESM-PDB-base | 0.94 |  | 0.64 |
| ESM-PDB-distilled | 0.89 |  | 0.77 |
| ESM-MD-base | 0.96 |  | 0.62 |
| ESM-MD-distilled | 0.90 |  | 0.68 |


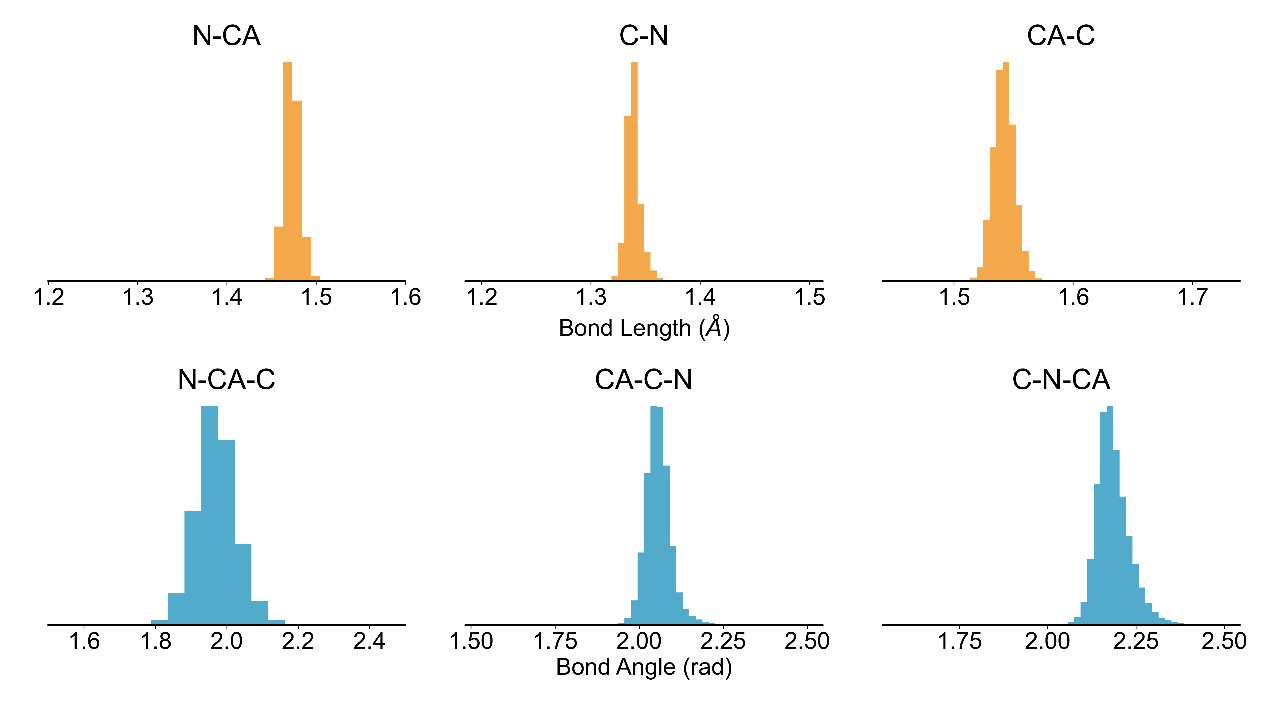


**Figure S1.** The bond lengths and angles of IDPFold generated conformations.


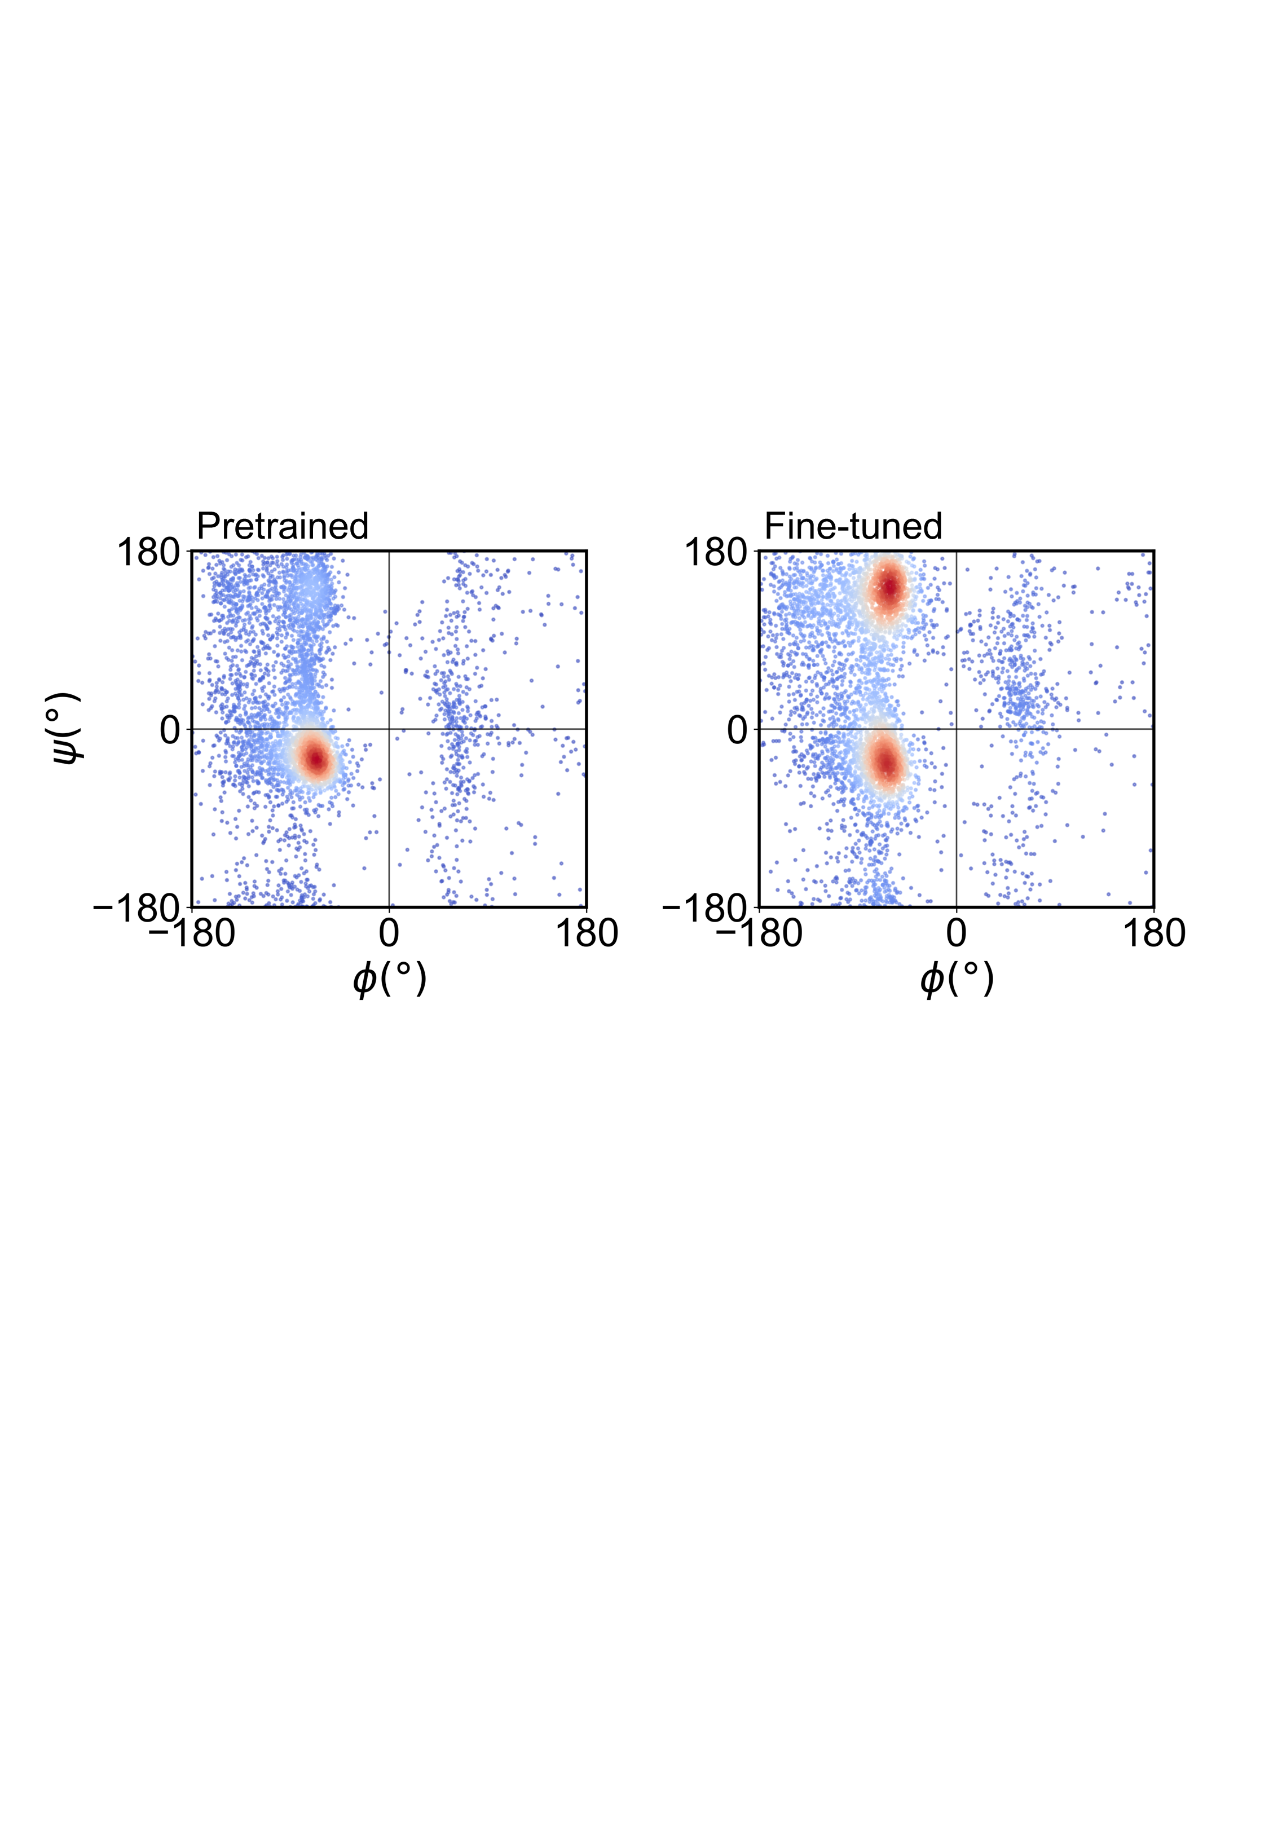


**Figure S2.** The Ramachandran plots of pretrained and fine-tuned IDPFold.


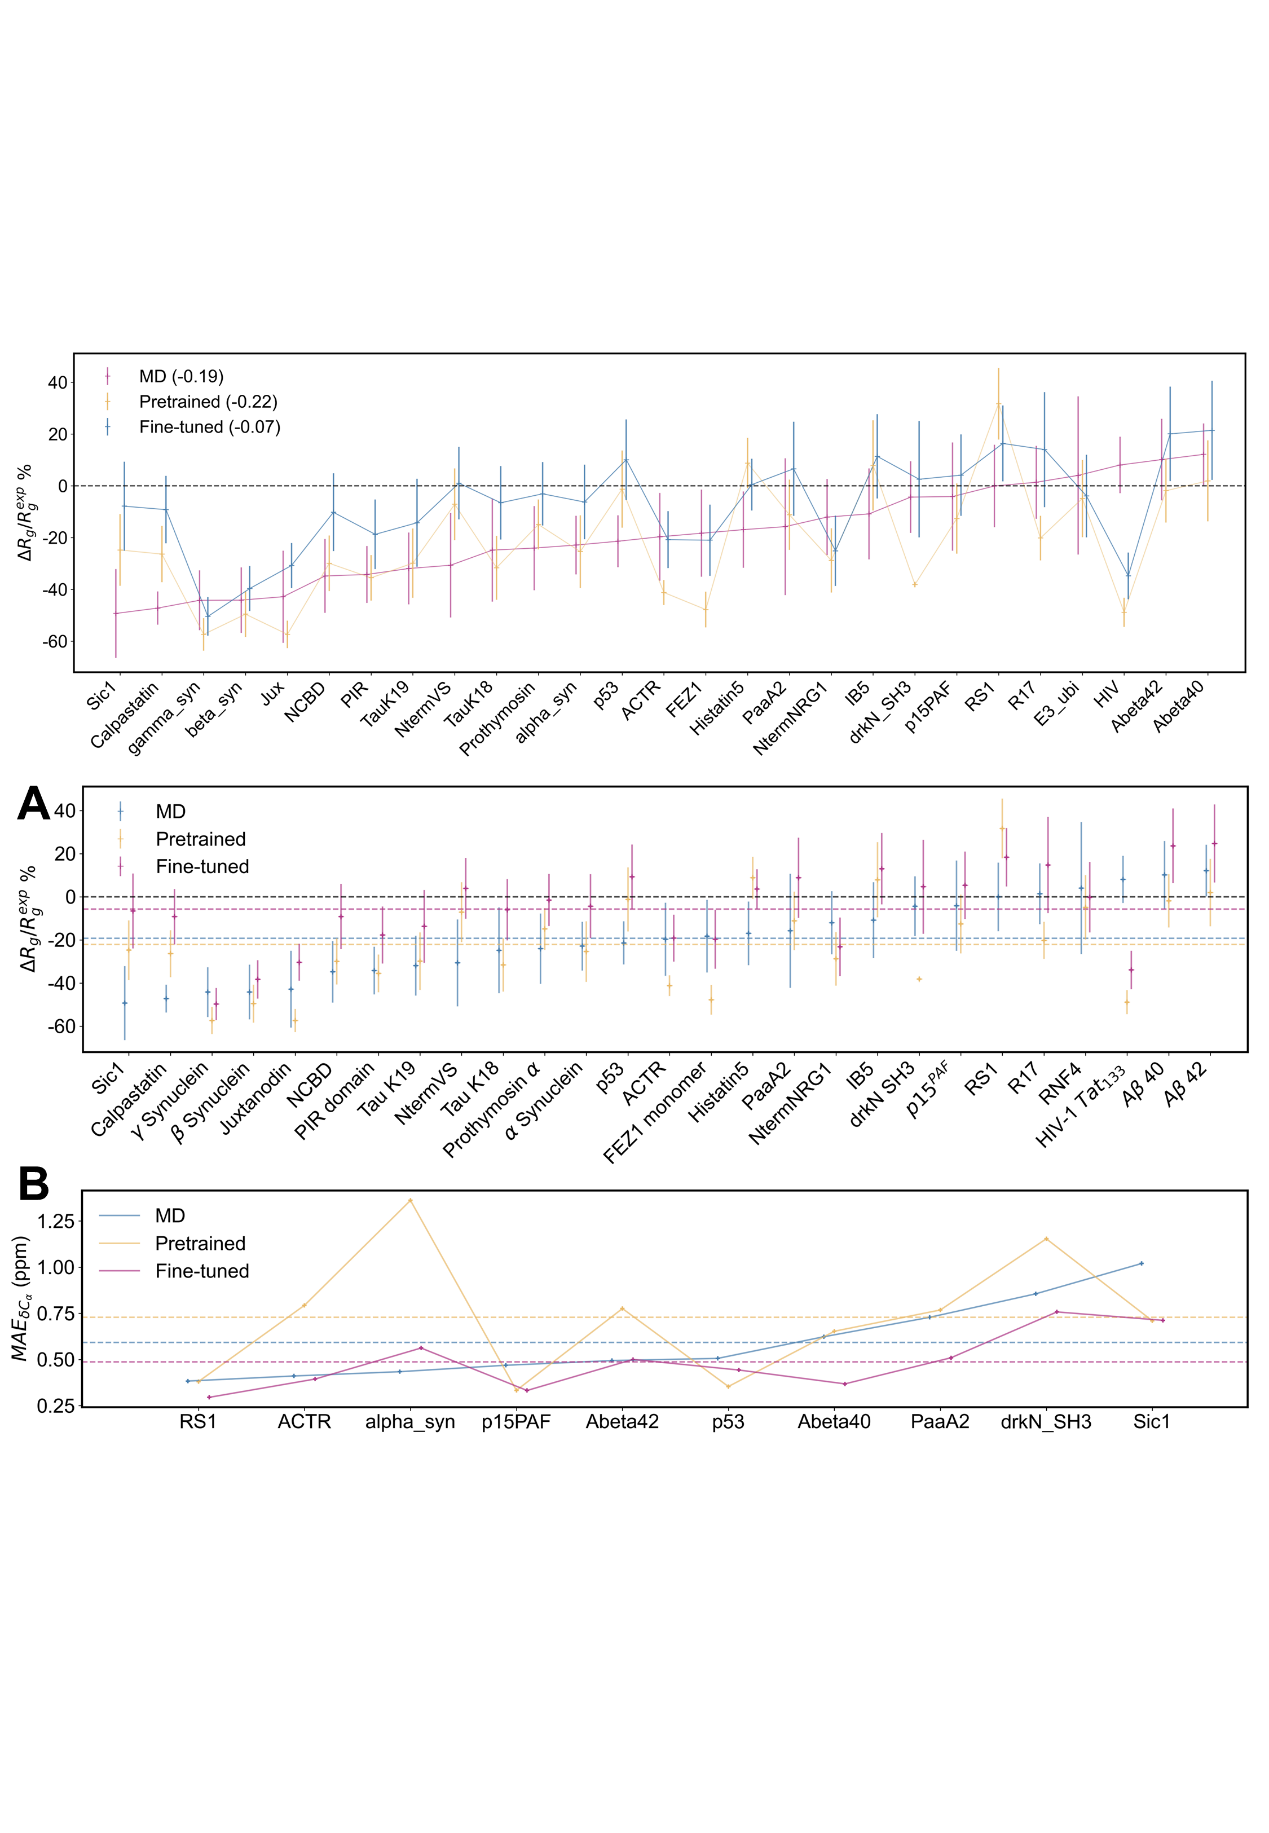


**Figure S3.** Differences between generated conformational ensembles and experimental observations. (A) Average Rg errors and their standard deviation on all 27 IDPs. (B) Mean average error on ensemble average chemical shift on all 10 IDPs.


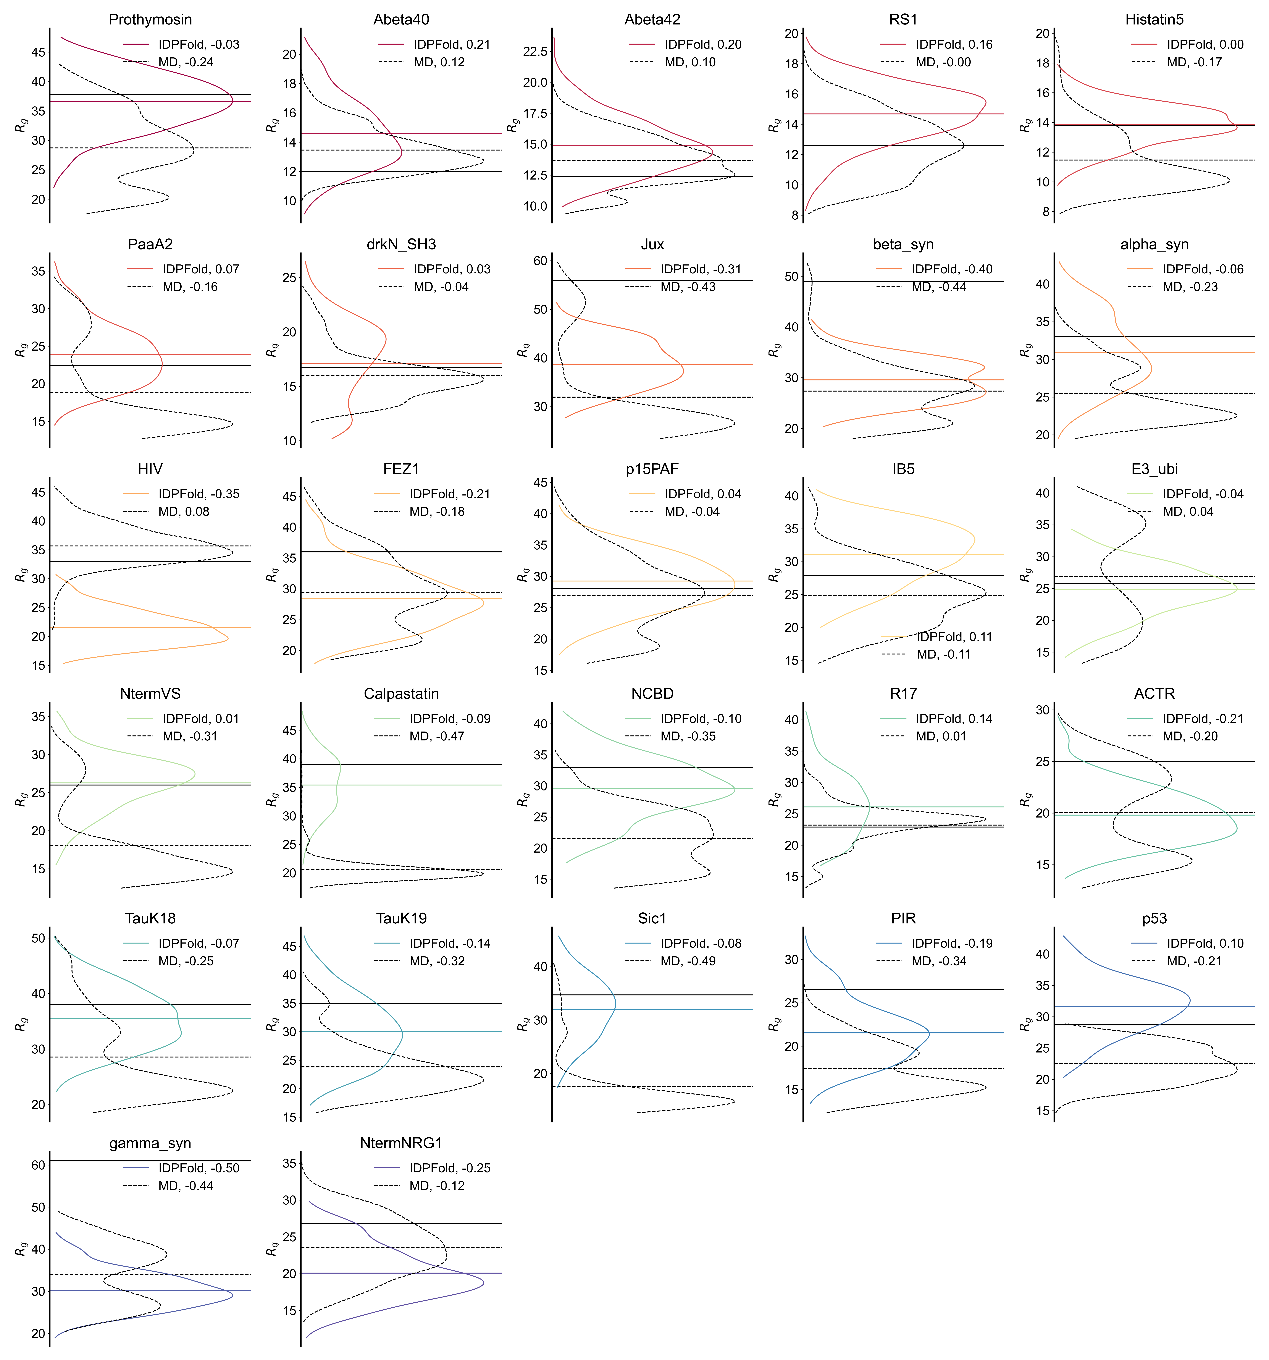


**Figure S4.** Rg distribution of **IDPFold** generated conformation ensembles (colored) and MD trajectories (black dashed) on 27 IDP systems. Experimental Rg values are plotted as black solid lines.


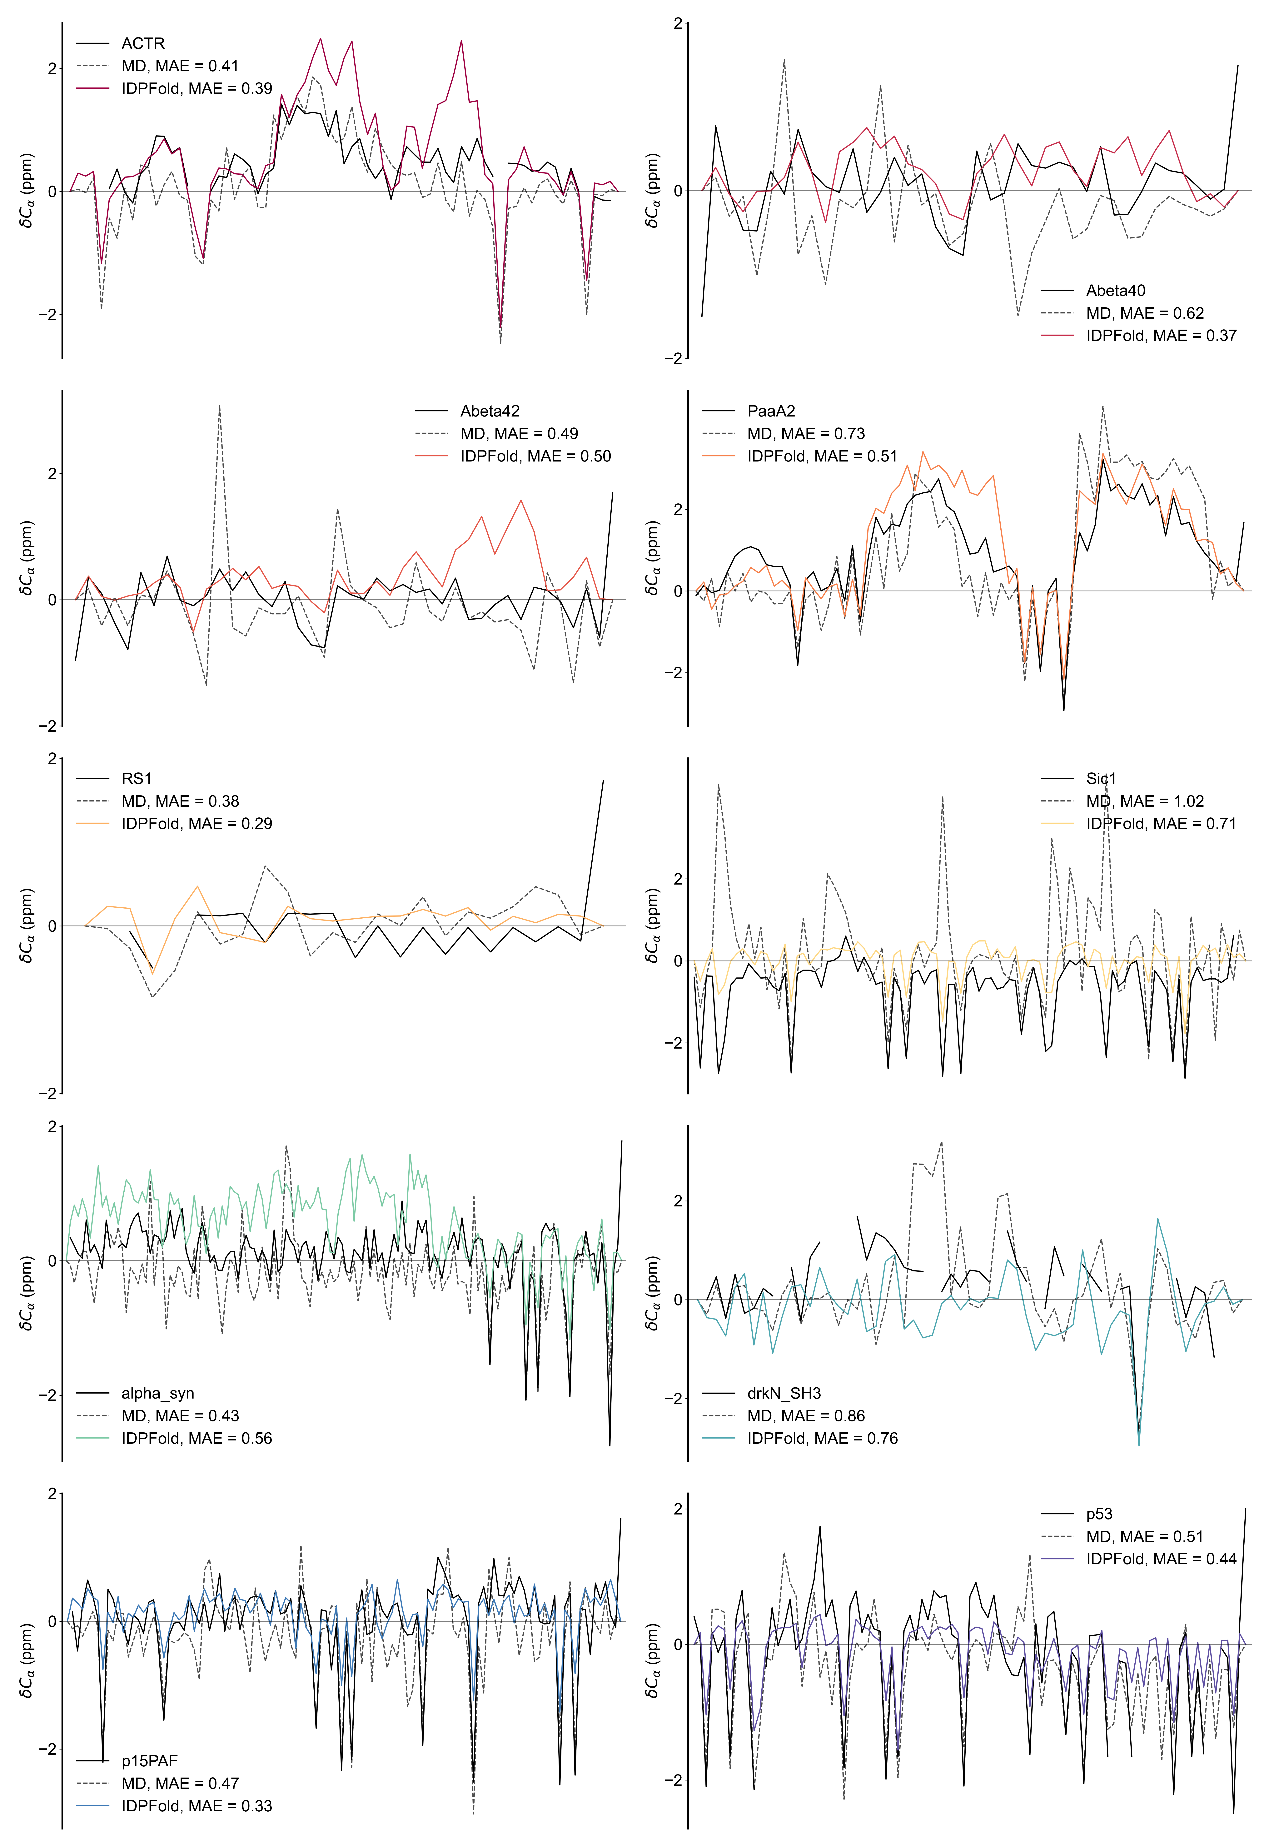


**Figure S5.** Ensemble average chemical shifts of **IDPFold** generated conformation ensembles (colored) and MD trajectories (black dashed) on 27 IDP systems. Experimental values are plotted as black solid lines.


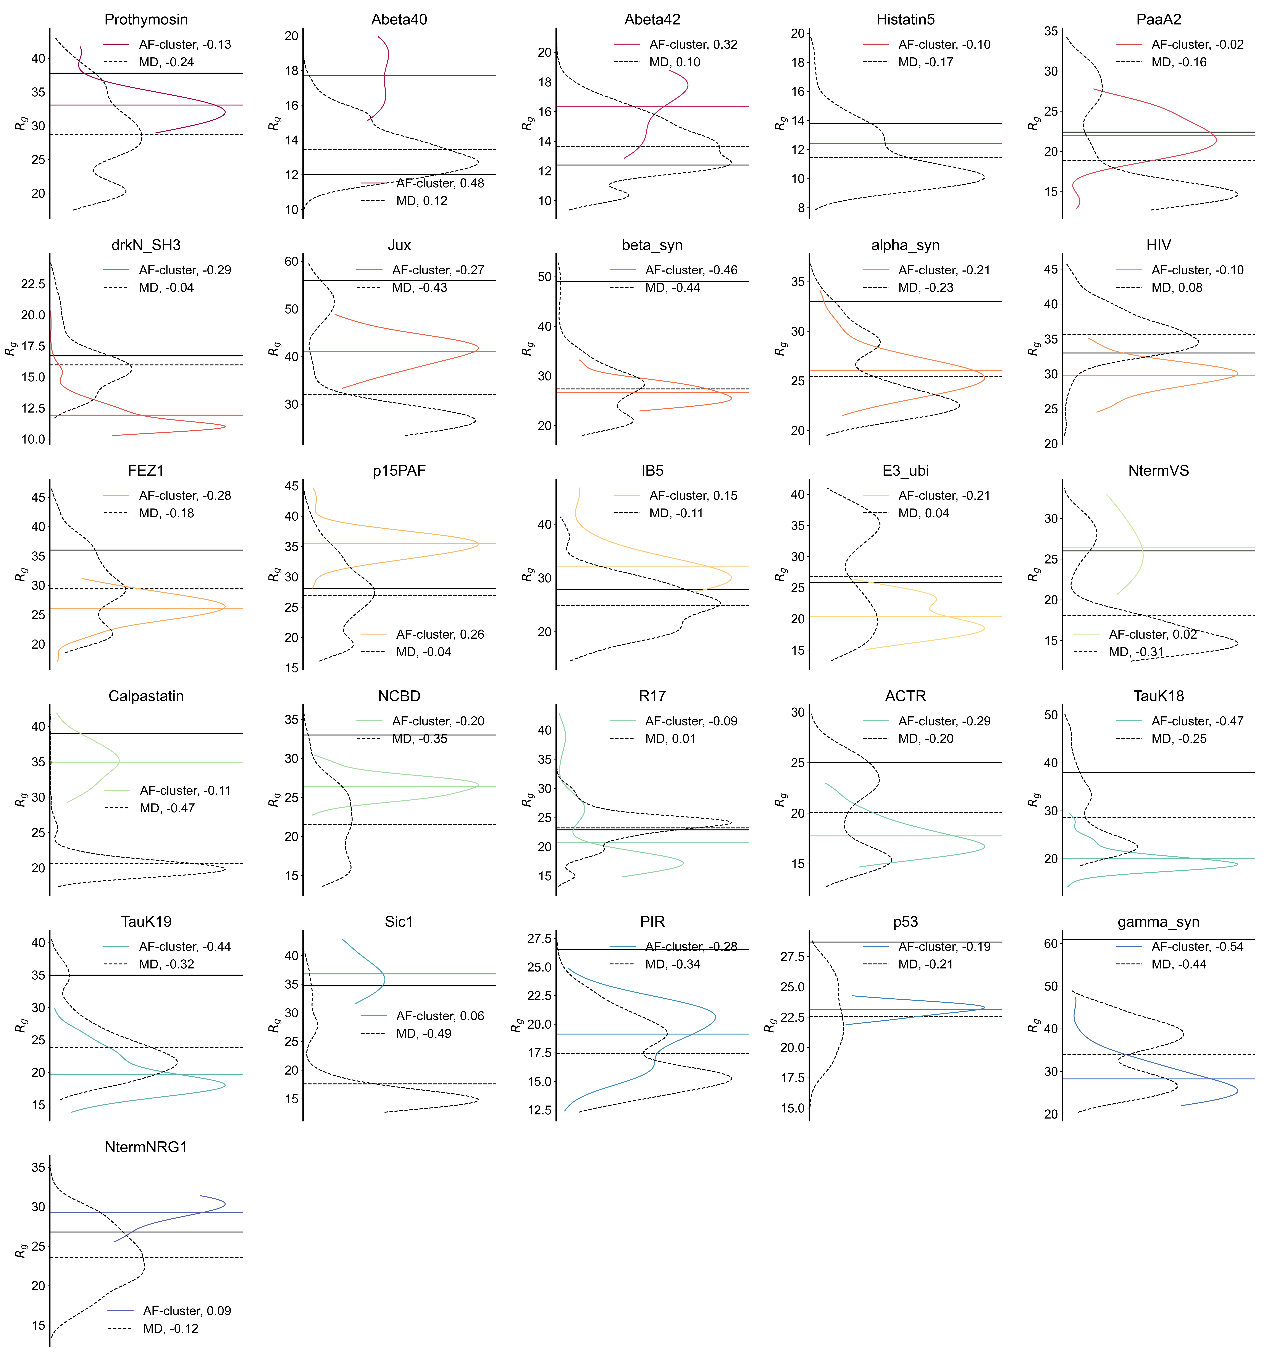


**Figure S6.** Rg distribution of **AF-cluster** generated conformation ensembles (colored) on 27 IDP systems. Experimental Rg values are plotted as black solid lines.


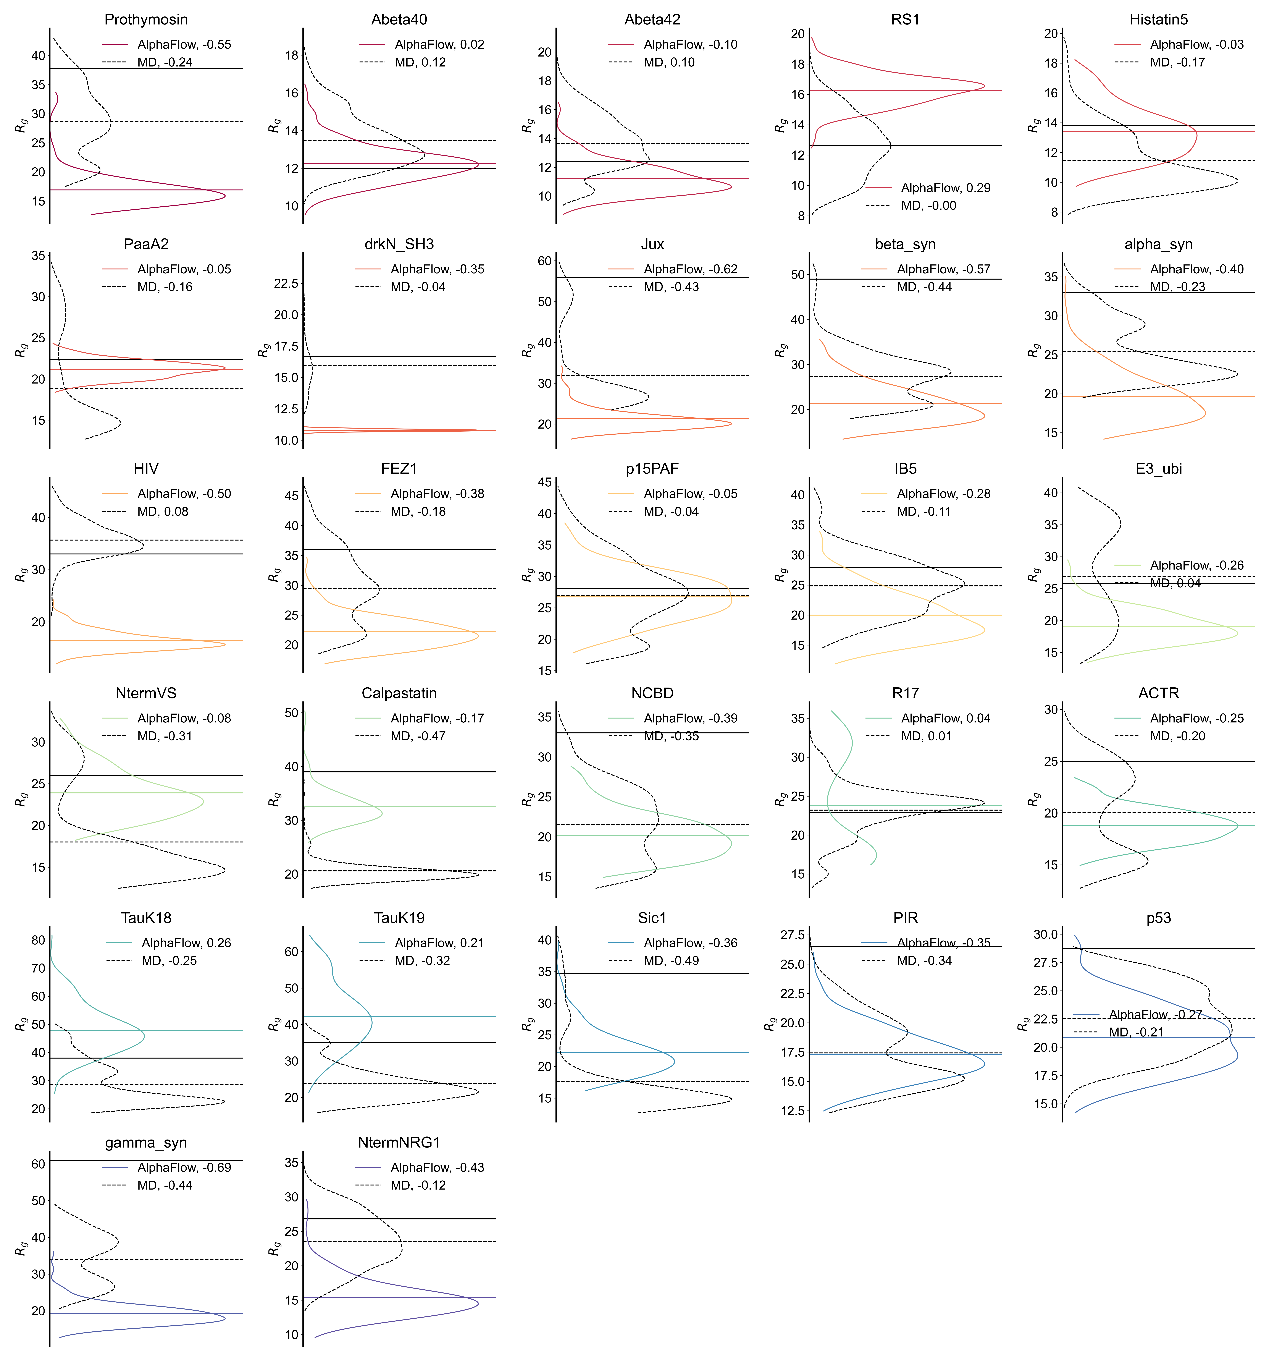


**Figure S7.** Rg distribution of **AlphaFlow** (PDB-base) generated conformation ensembles (colored) on 27 IDP systems. Experimental Rg values are plotted as black solid lines.


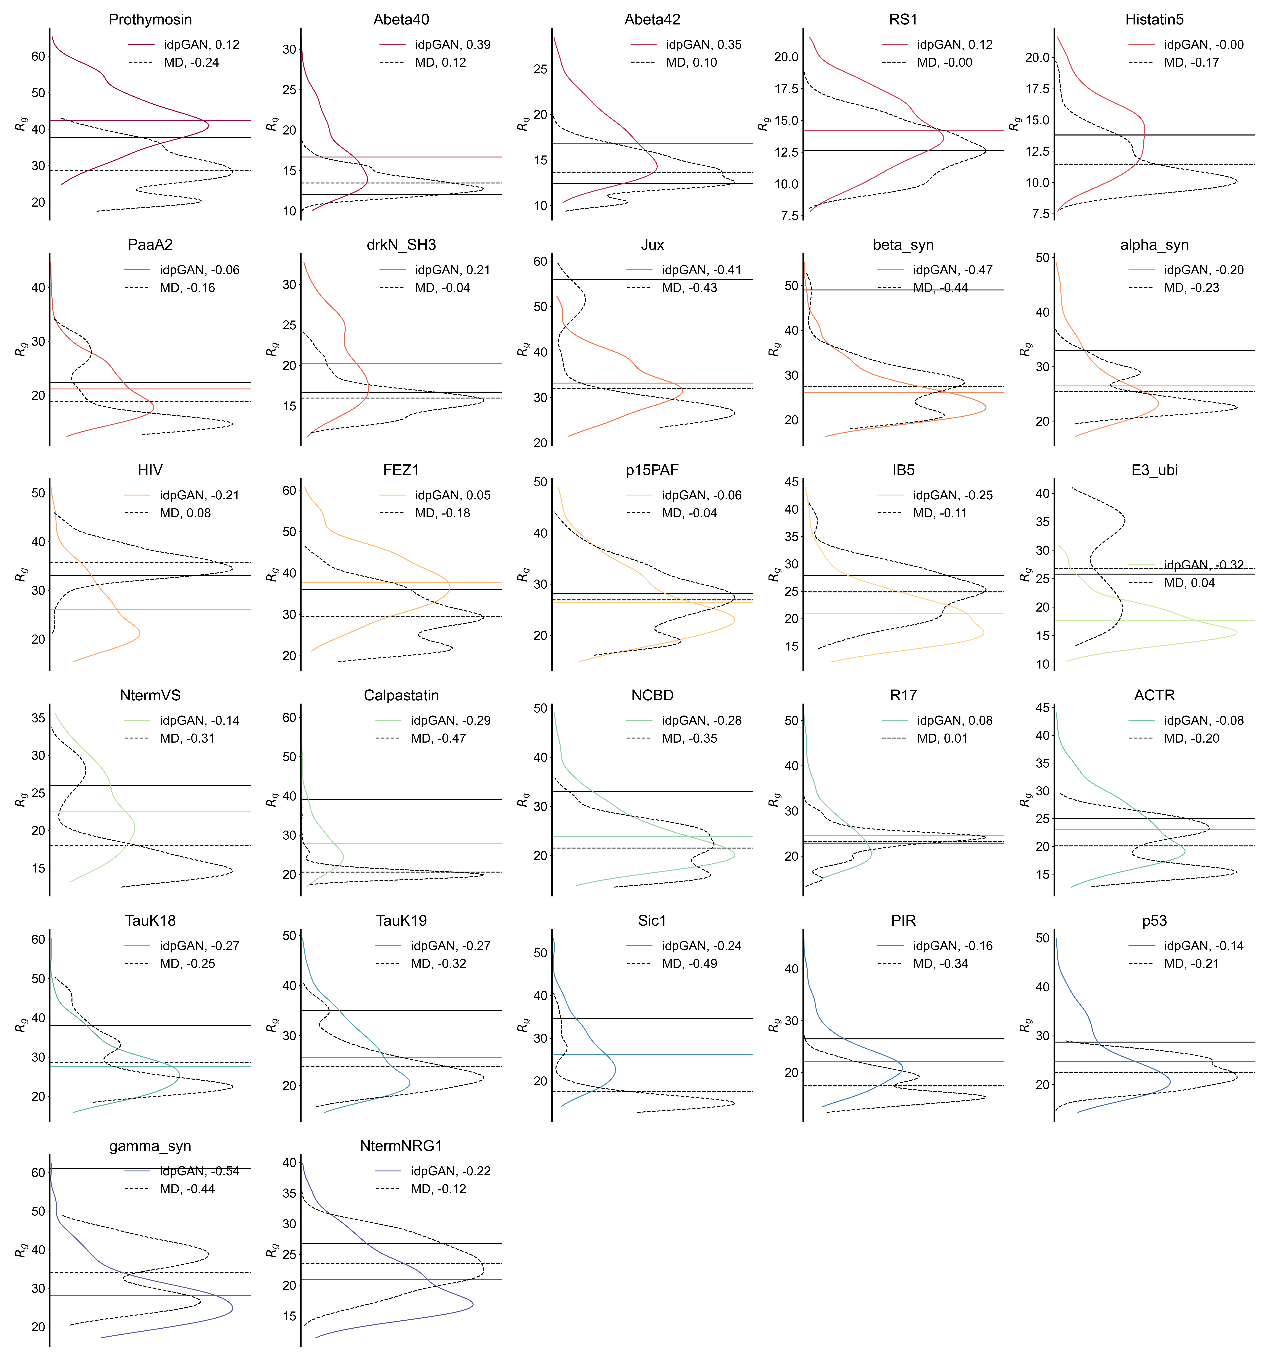


**Figure S8.** Rg distribution of **idpGAN** generated conformation ensembles (colored) on 27 IDP systems. Experimental Rg values are plotted as black solid lines.


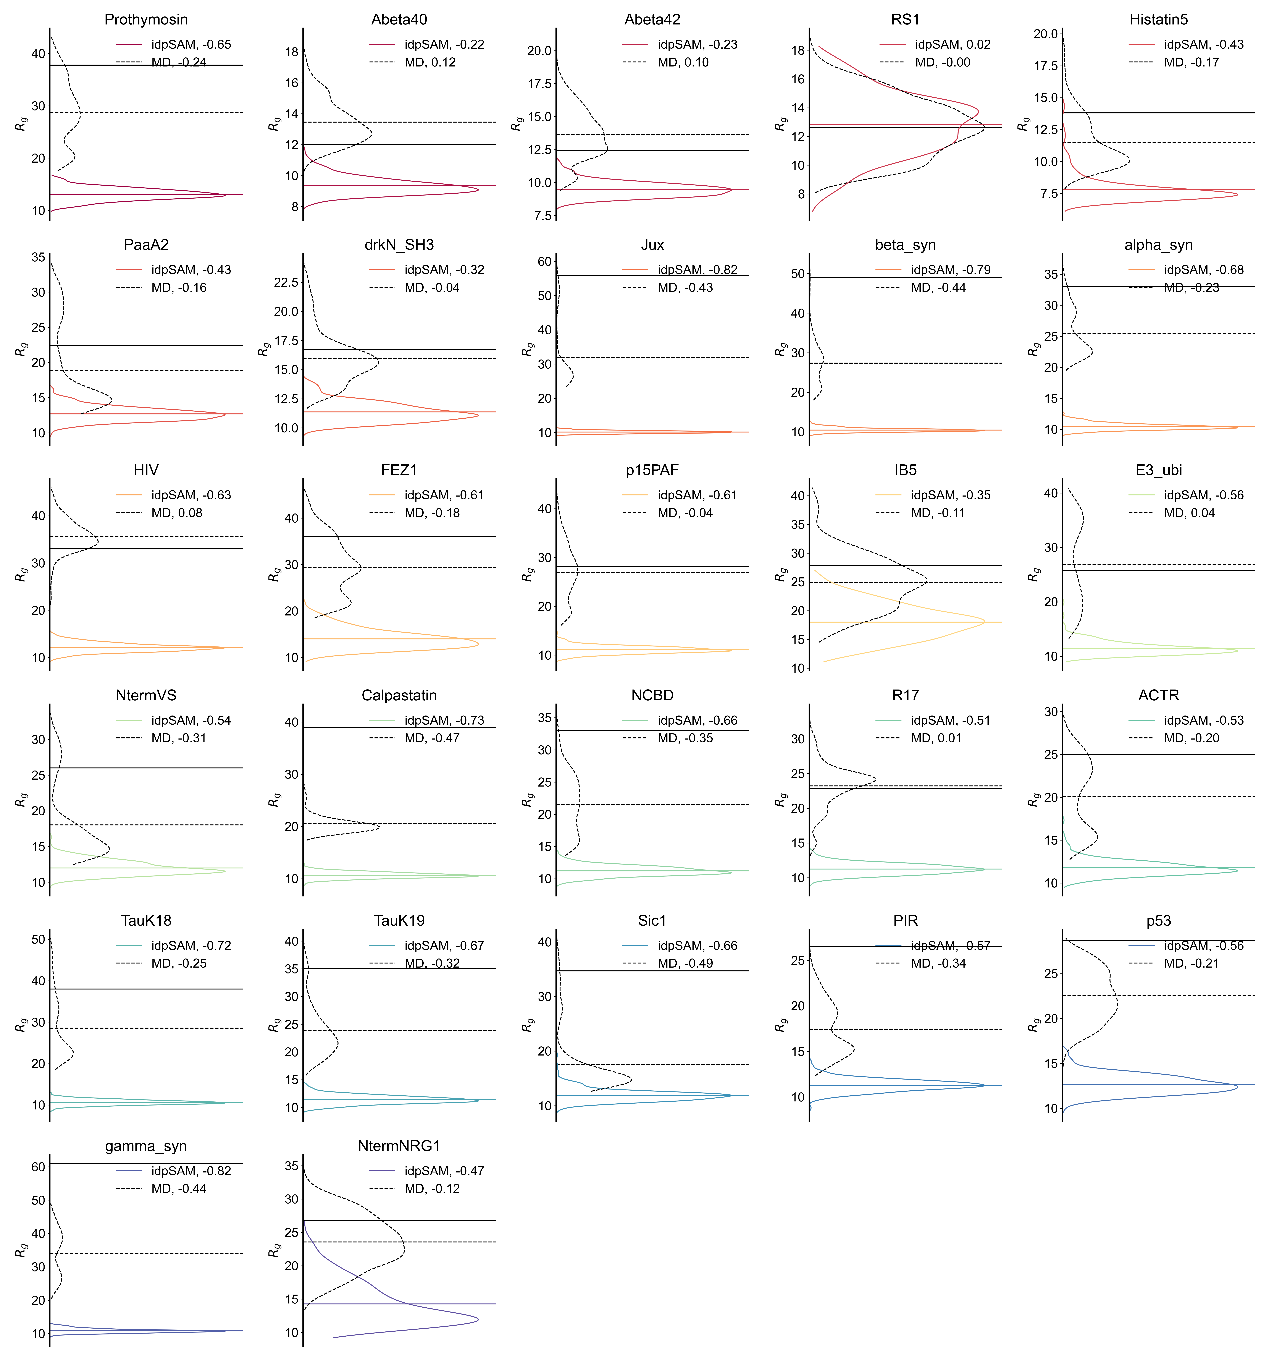


**Figure S9.** Rg distribution of **idpSAM** generated conformation ensembles (colored) on 27 IDP systems. Experimental Rg values are plotted as black solid lines.


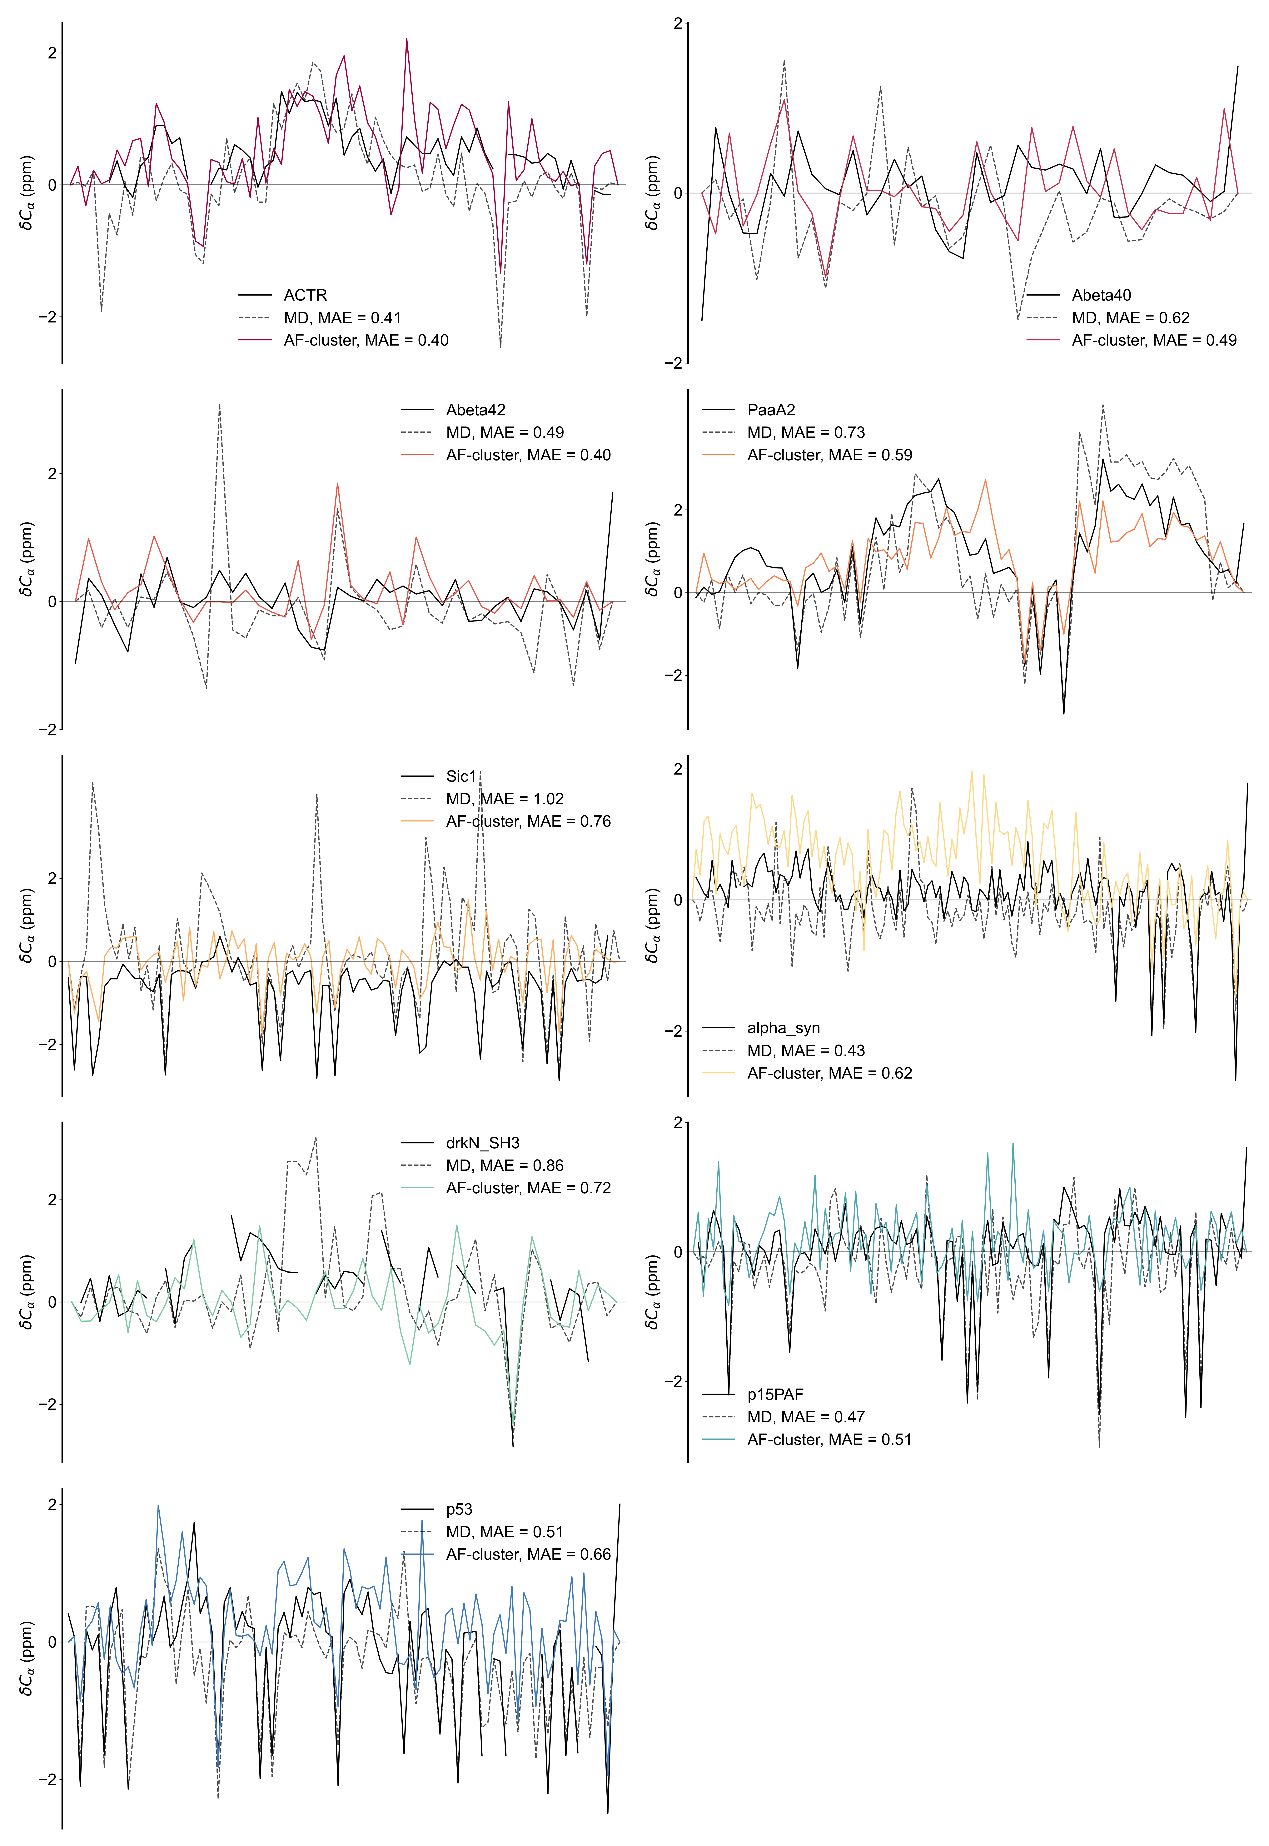


**Figure S10.** Ensemble average chemical shifts of **AF-cluster** generated conformation ensembles (colored) on 27 IDP systems. Experimental values are plotted as black solid lines.


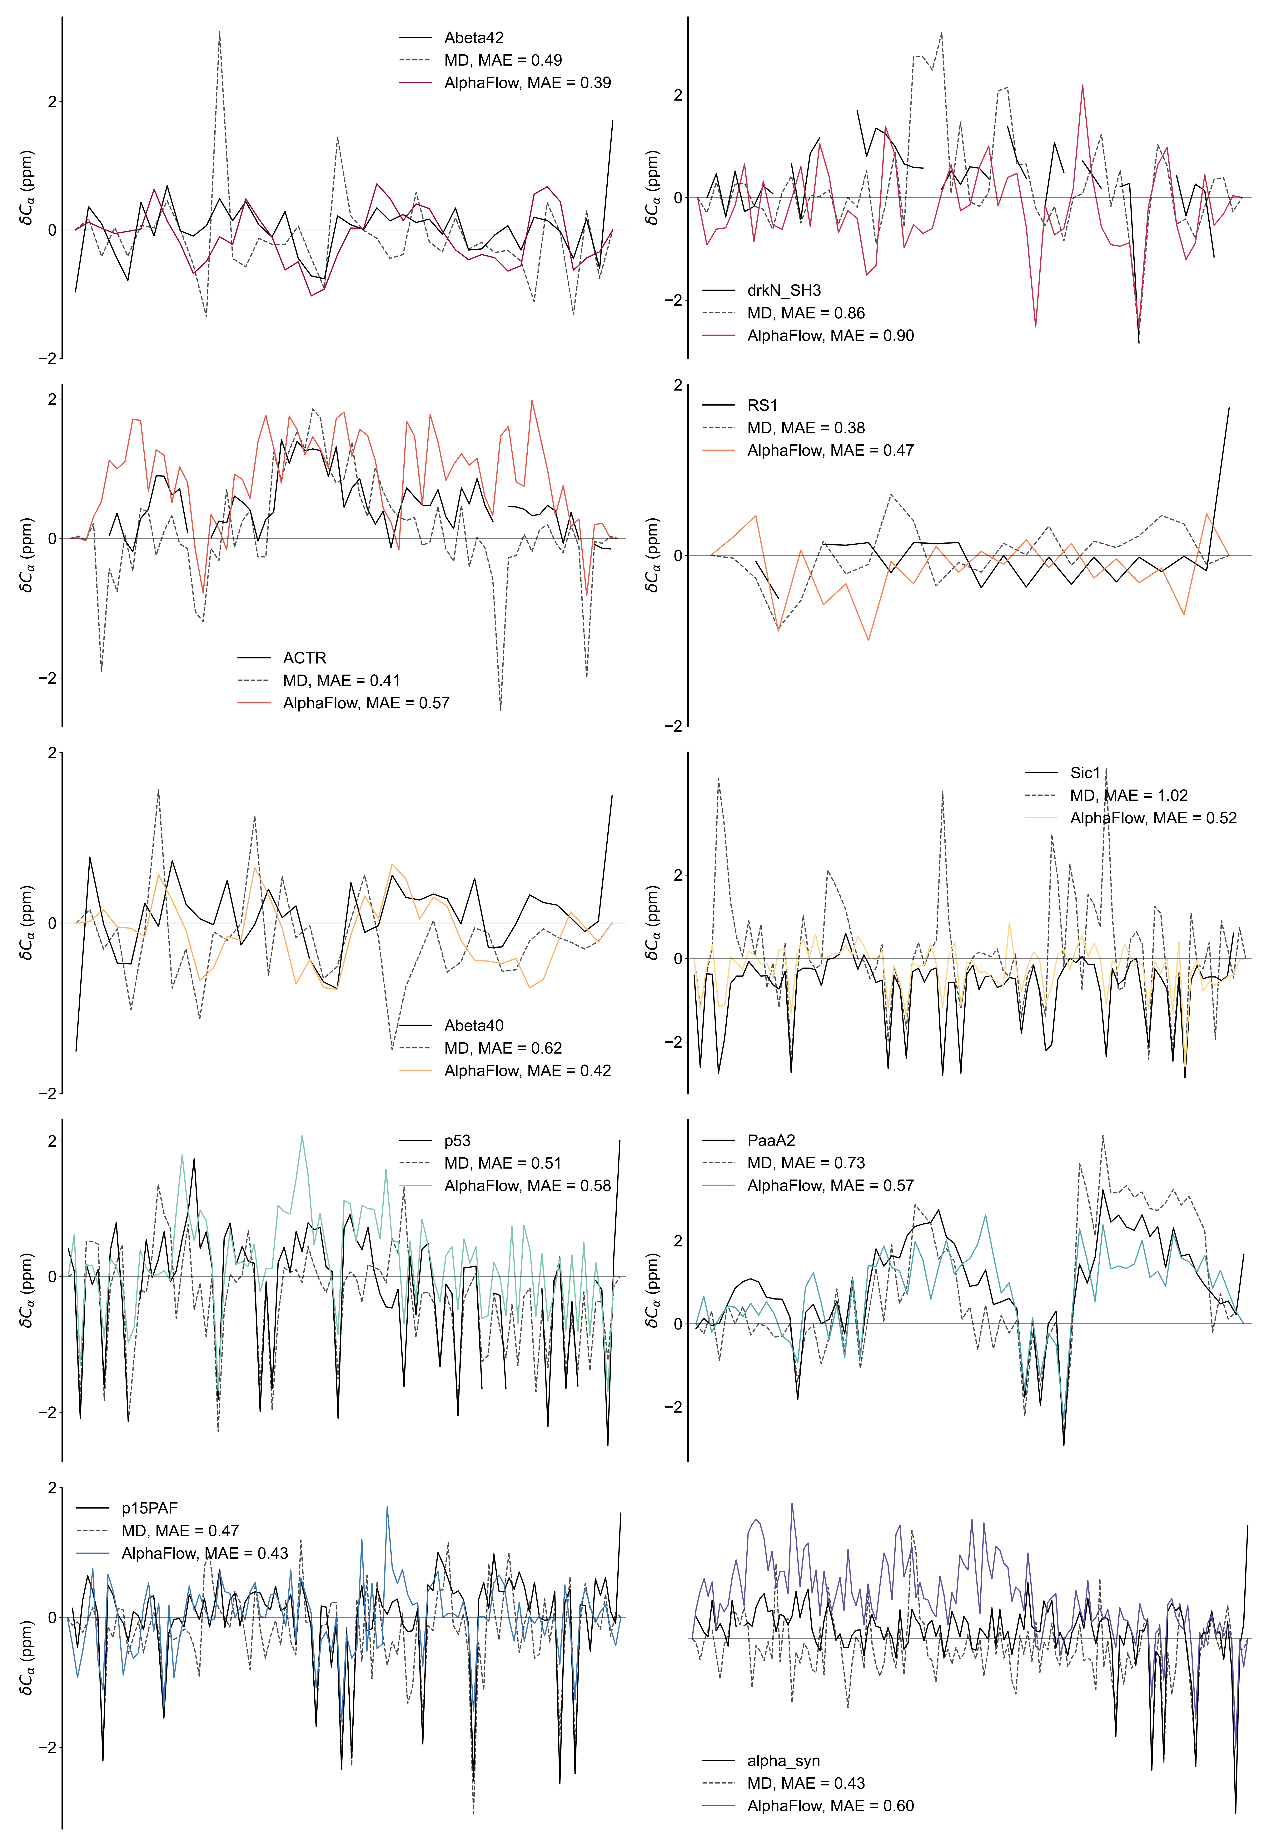


**Figure S11.** Ensemble average chemical shifts of **AlphaFlow** (PDB-base) generated conformation ensembles (colored) on 27 IDP systems. Experimental values are plotted as black solid lines.


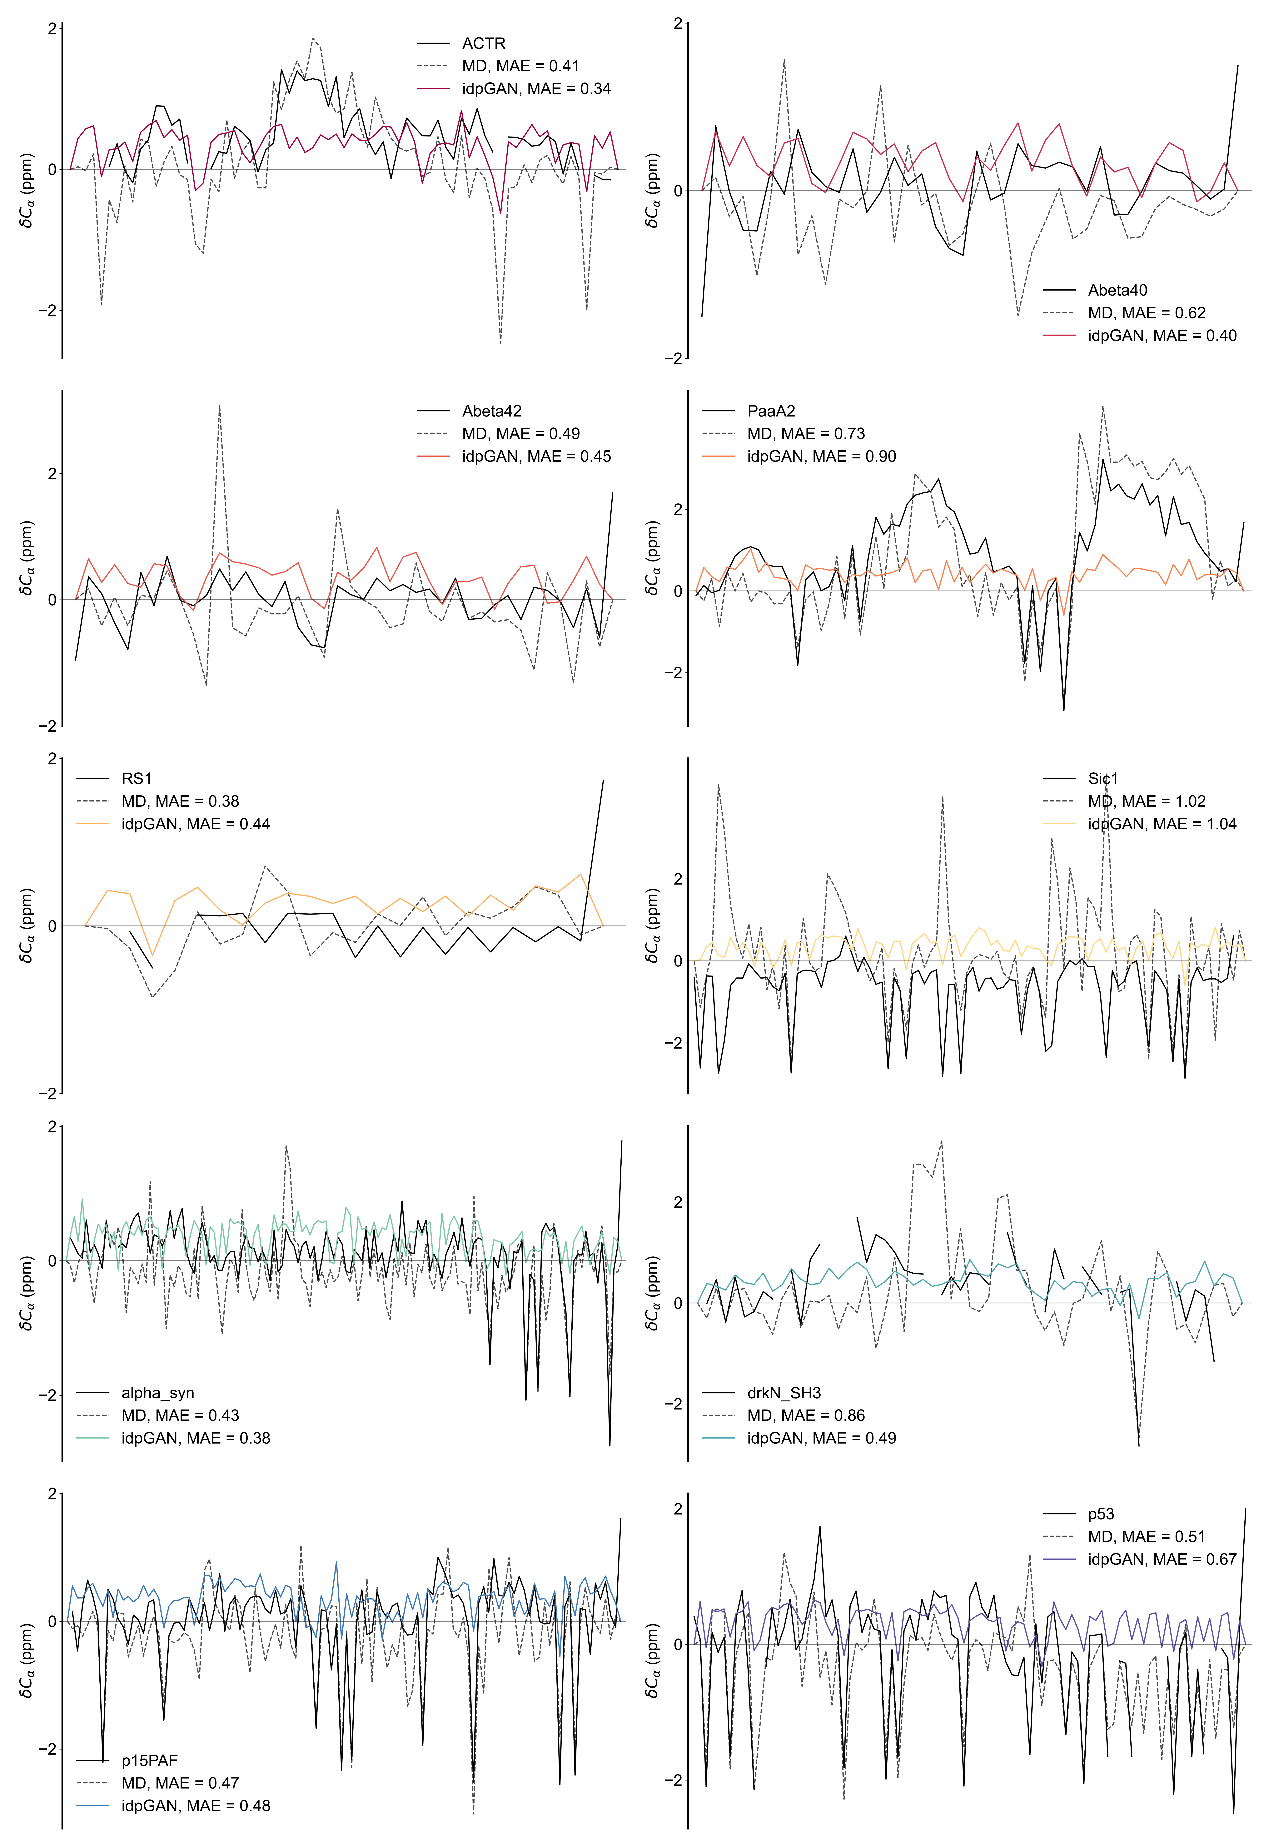


**Figure S12.** Ensemble average chemical shifts of **idpGAN** generated conformation ensembles (colored) on 27 IDP systems. Experimental values are plotted as black solid lines.


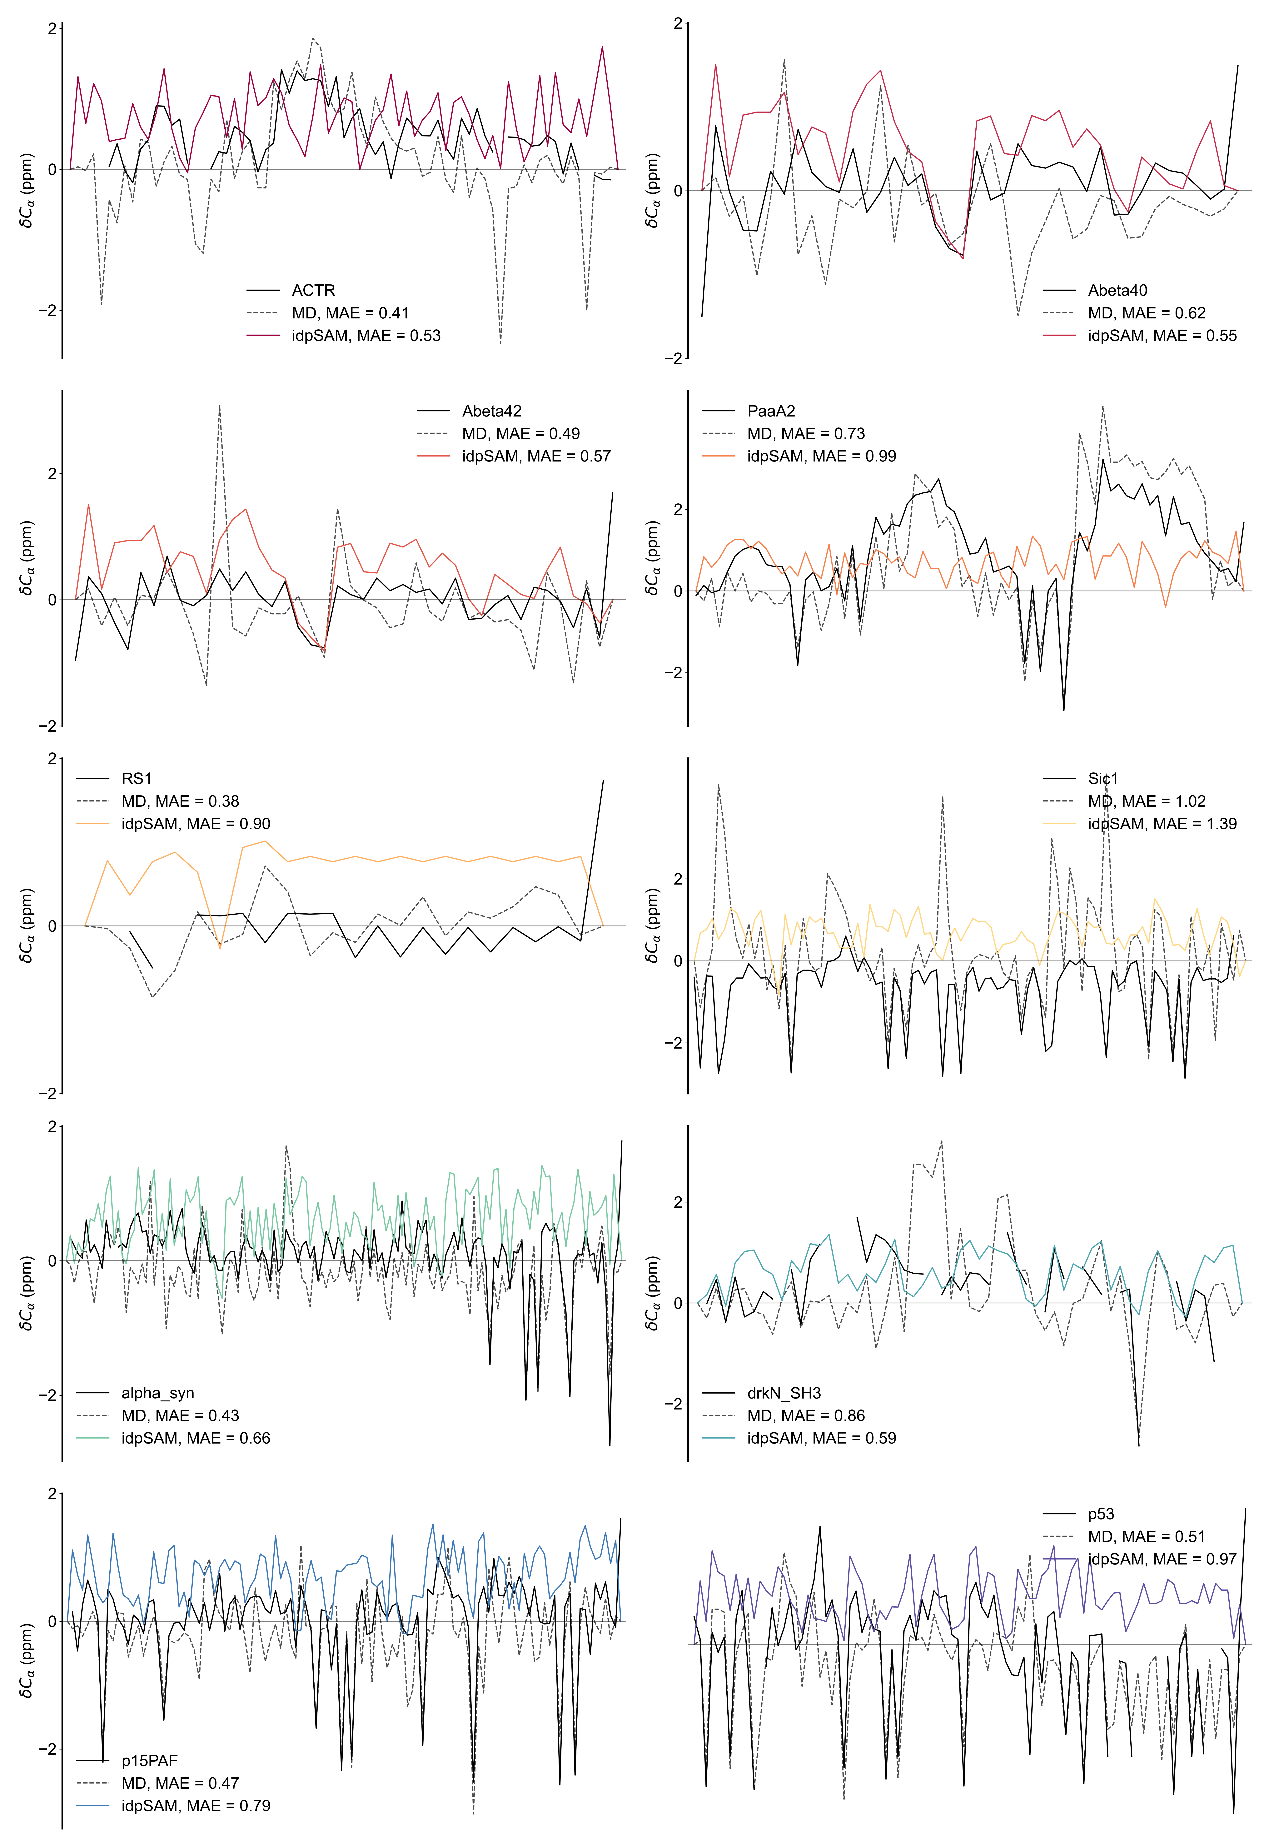


**Figure S13.** Ensemble average chemical shifts of **idpSAM** generated conformation ensembles (colored) on 27 IDP systems. Experimental values are plotted as black solid lines.


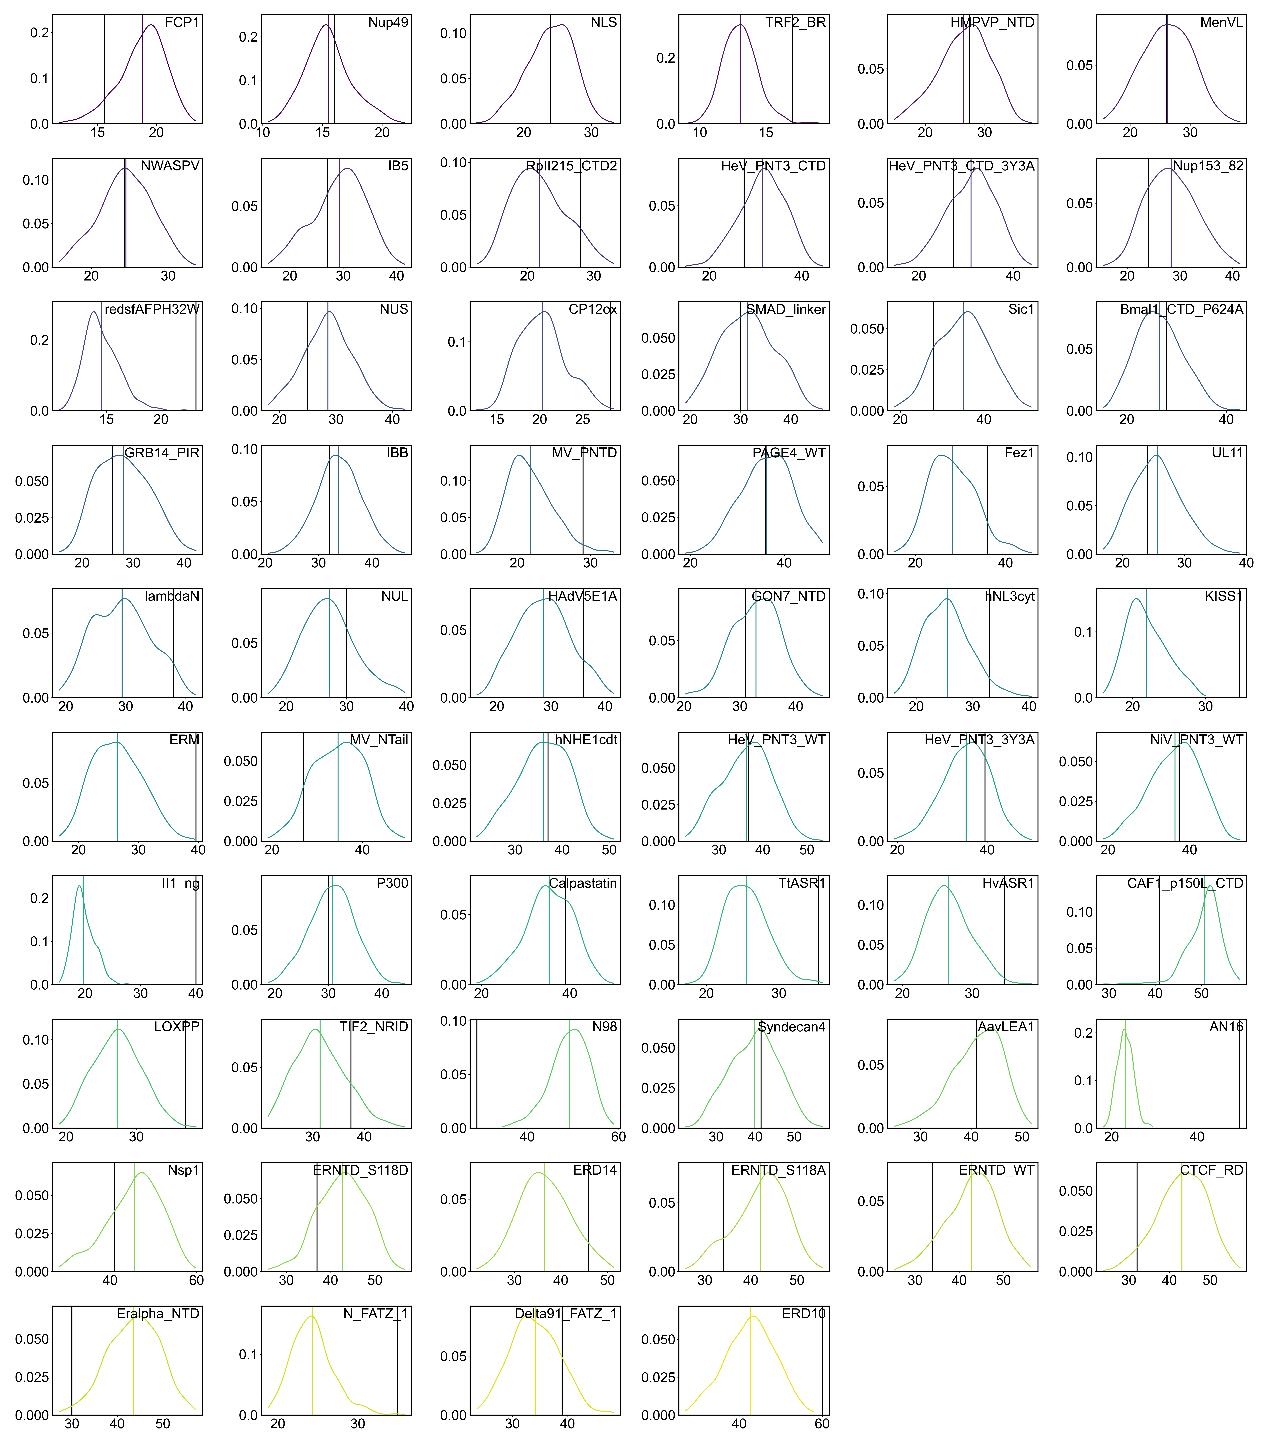


**Figure S14.** Rg distribution of **IDPFold** generated conformation ensembles (colored) on 58 IDP systems from IDRome. Experimental Rg values are plotted as black solid lines.


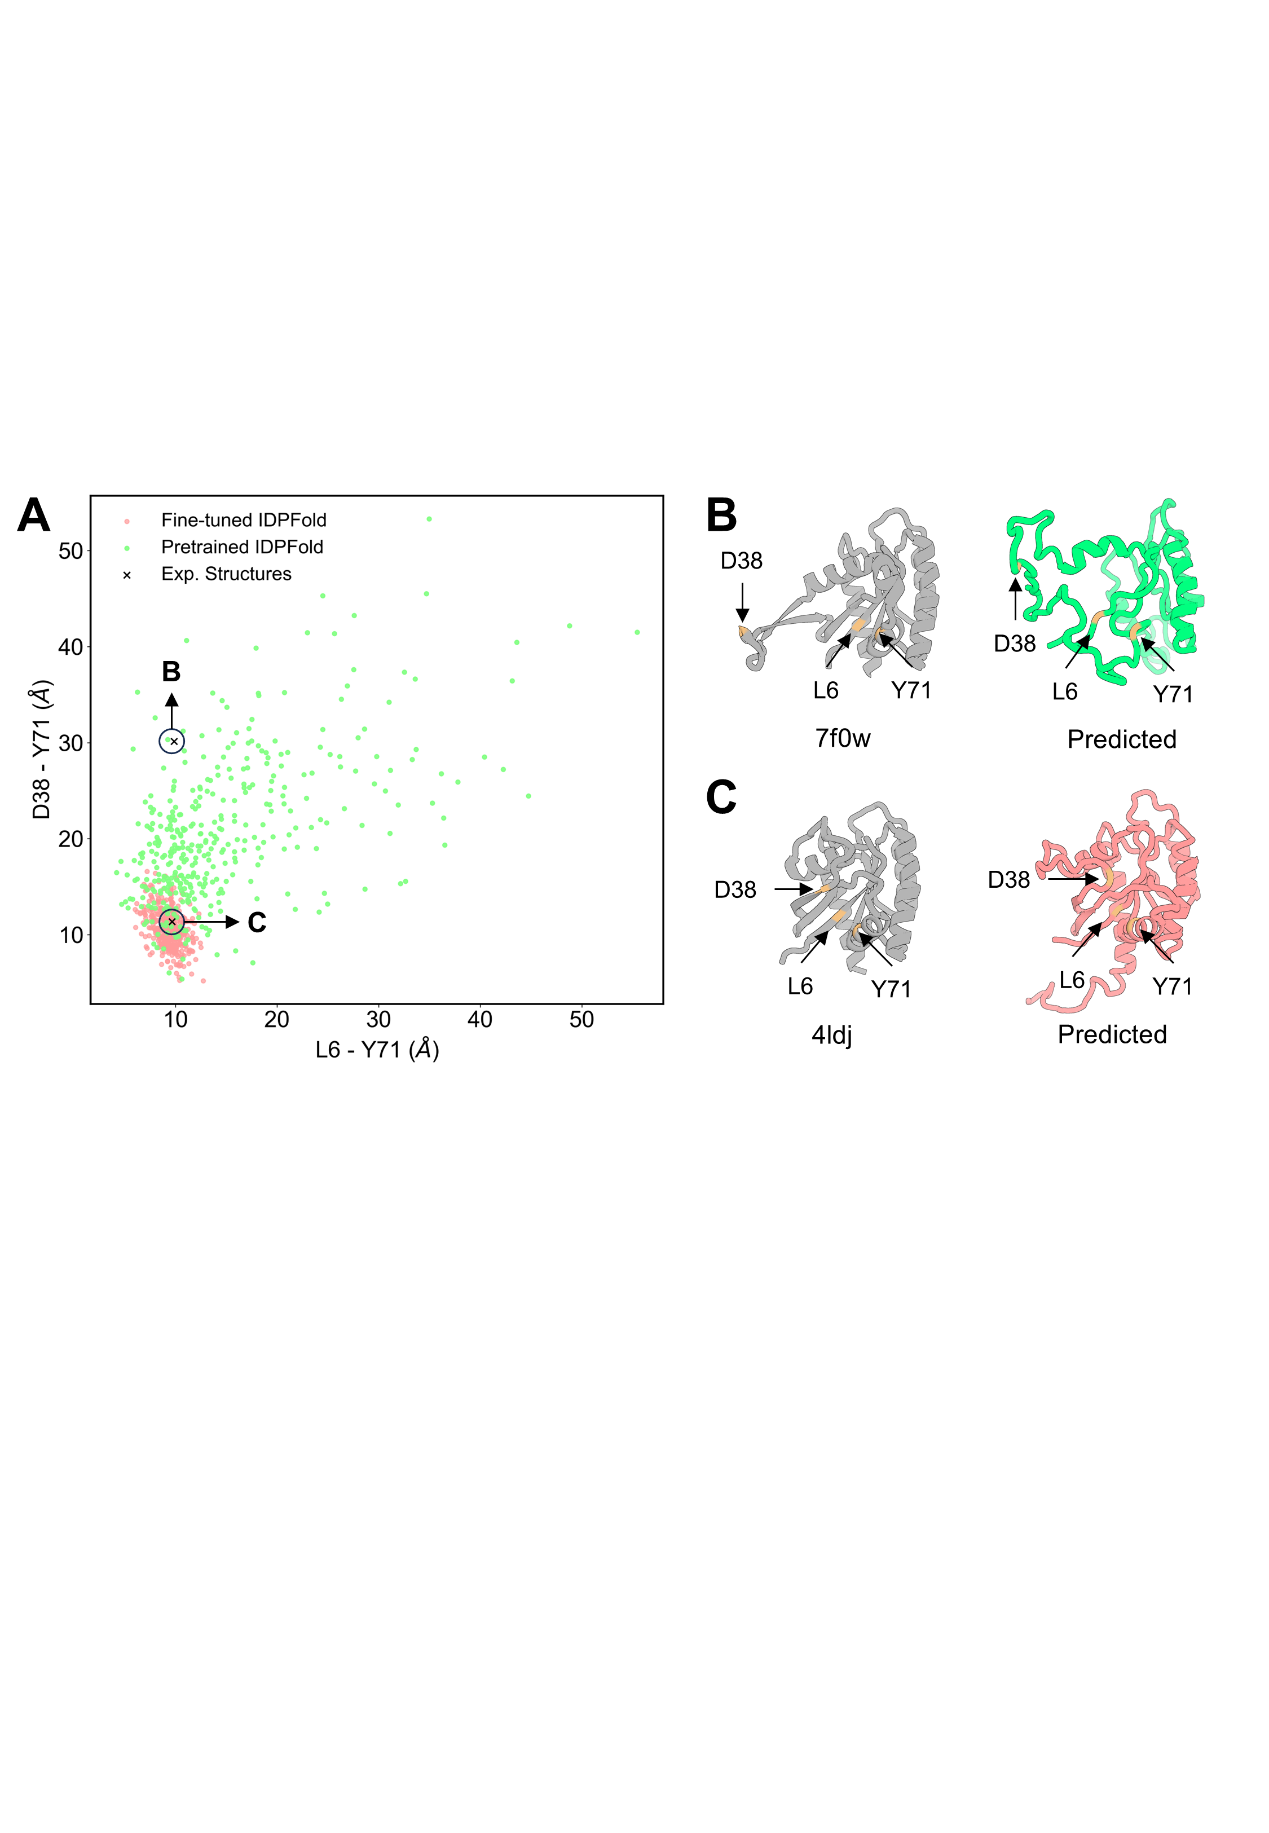


**Figure S15.** IDPFold generates a wide range of conformations for allosteric proteins. (A) IDPFold generated conformations mapped on L6-Y71-D38 distance plane. (B) Fine-tuned IDPFold generated conformation compared to X-ray structure (PDB ID: 7f0w). (C) Pretrained IDPFold generated conformation compared to X-ray structure (PDB ID: 4ldj)30.

### References

1. Mittag, T. *et al.* Structure/Function Implications in a Dynamic Complex of the Intrinsically Disordered Sic1 with the Cdc4 Subunit of an SCF Ubiquitin Ligase. *Structure* **18**, 494–506 (2010).

2. Granata, D. *et al.* The inverted free energy landscape of an intrinsically disordered peptide by simulations and experiments. *Sci. Rep.* **5**, 15449 (2015).

3. Hou, L. *et al.* Solution NMR Studies of the Aβ(1−40) and Aβ(1−42) Peptides Establish that the Met35 Oxidation State Affects the Mechanism of Amyloid Formation. *J. Am. Chem. Soc.* **126**, 1992–2005 (2004).

4. Ball, K. A. *et al.* Homogeneous and Heterogeneous Tertiary Structure Ensembles of Amyloid-β Peptides. *Biochemistry* **50**, 7612–7628 (2011).

5. Rauscher, S. *et al.* Structural Ensembles of Intrinsically Disordered Proteins Depend Strongly on Force Field: A Comparison to Experiment. *J. Chem. Theory Comput.* **11**, 5513–5524 (2015).

6. Xiang, S. *et al.* Phosphorylation Drives a Dynamic Switch in Serine/Arginine-Rich Proteins. *Structure* **21**, 2162–2174 (2013).

7. Cragnell, C., Durand, D., Cabane, B. & Skepö, M. Coarse-grained modeling of the intrinsically disordered protein Histatin 5 in solution: Monte Carlo simulations in combination with SAXS. *Proteins Struct. Funct. Bioinforma.* **84**, 777–791 (2016).

8. De Biasio, A. *et al.* p15PAF Is an Intrinsically Disordered Protein with Nonrandom Structural Preferences at Sites of Interaction with Other Proteins. *Biophys. J.* **106**, 865–874 (2014).

9. Alborghetti, M. R. *et al.* Human FEZ1 Protein Forms a Disulfide Bond Mediated Dimer: Implications for Cargo Transport. *J. Proteome Res.* **9**, 4595–4603 (2010).

10. Foucault, M. *et al.* UV and X-ray structural studies of a 101-residue long Tat protein from a HIV-1 primary isolate and of its mutated, detoxified, vaccine candidate. *Proteins Struct. Funct. Bioinforma.* **78**, 1441–1456 (2010).

11. Hofmann, H. *et al.* Polymer scaling laws of unfolded and intrinsically disordered proteins quantified with single-molecule spectroscopy. *Proc. Natl. Acad. Sci.* **109**, 16155–16160 (2012).

12. Moncoq, K. *et al.* SAXS Study of the PIR Domain from the Grb14 Molecular Adaptor: A Natively Unfolded Protein with a Transient Structure Primer? *Biophys. J.* **87**, 4056–4064 (2004).

13. Boze, H. *et al.* Proline-Rich Salivary Proteins Have Extended Conformations. *Biophys. J.* **99**, 656–665 (2010).

14. Sterckx, Y. G. J. *et al.* Small-Angle X-Ray Scattering- and Nuclear Magnetic Resonance-Derived Conformational Ensemble of the Highly Flexible Antitoxin PaaA2. *Structure* **22**, 854–865 (2014).

15. Kjaergaard, M. *et al.* Temperature-dependent structural changes in intrinsically disordered proteins: Formation of α‒helices or loss of polyproline II? *Protein Sci.* **19**, 1555–1564 (2010).

16. Iešmantavičius, V. *et al.* Modulation of the Intrinsic Helix Propensity of an Intrinsically Disordered Protein Reveals Long-Range Helix–Helix Interactions. *J. Am. Chem. Soc.* **135**, 10155–10163 (2013).

17. Choy, W.-Y. *et al.* Distribution of molecular size within an unfolded state ensemble using small-angle X-ray scattering and pulse field gradient NMR techniques1. *J. Mol. Biol.* **316**, 101–112 (2002).

18. Lee, J. H. *et al.* Heterogeneous binding of the SH3 client protein to the DnaK molecular chaperone. *Proc. Natl. Acad. Sci.* **112**, E4206–E4215 (2015).

19. Ruskamo, S. *et al.* Juxtanodin is an intrinsically disordered F-actin-binding protein. *Sci. Rep.* **2**, 899 (2012).

20. Morar, A. S., Olteanu, A., Young, G. B. & Pielak, G. J. Solvent-induced collapse of α-synuclein and acid-denatured cytochrome c. *Protein Sci.* **10**, 2195–2199 (2001).

21. Ebert, M.-O., Bae, S.-H., Dyson, H. J. & Wright, P. E. NMR Relaxation Study of the Complex Formed Between CBP and the Activation Domain of the Nuclear Hormone Receptor Coactivator ACTR†. *Biochemistry* **47**, 1299–1308 (2008).

22. Uversky, V. N. *et al.* Biophysical Properties of the Synucleins and Their Propensities to Fibrillate: INHIBITION OF α-SYNUCLEIN ASSEMBLY BY β- AND γ-SYNUCLEINS*. *J. Biol. Chem.* **277**, 11970–11978 (2002).

23. Mylonas, E. *et al.* Domain Conformation of Tau Protein Studied by Solution Small-Angle X-ray Scattering. *Biochemistry* **47**, 10345–10353 (2008).

24. Uversky, V. N. *et al.* Natively Unfolded Human Prothymosin α Adopts Partially Folded Collapsed Conformation at Acidic pH. *Biochemistry* **38**, 15009–15016 (1999).

25. Wells, M. *et al.* Structure of tumor suppressor p53 and its intrinsically disordered N-terminal transactivation domain. *Proc. Natl. Acad. Sci.* **105**, 5762–5767 (2008).

26. Borysik, A. J., Kovacs, D., Guharoy, M. & Tompa, P. Ensemble Methods Enable a New Definition for the Solution to Gas-Phase Transfer of Intrinsically Disordered Proteins. *J. Am. Chem. Soc.* **137**, 13807–13817 (2015).

27. Chukhlieb, M., Raasakka, A., Ruskamo, S. & Kursula, P. The N-terminal cytoplasmic domain of neuregulin 1 type III is intrinsically disordered. *Amino Acids* **47**, 1567–1577 (2015).

28. Leyrat, C. *et al.* The N0-binding region of the vesicular stomatitis virus phosphoprotein is globally disordered but contains transient α-helices. *Protein Sci.* **20**, 542–556 (2011).

29. Kung, C. C.-H. *et al.* Structural analysis of poly-SUMO chain recognition by the RNF4-SIMs domain. *Biochem. J.* **462**, 53–65 (2014).

30. Hunter, J. C. *et al.* In situ selectivity profiling and crystal structure of SML-8-73-1, an active site inhibitor of oncogenic K-Ras G12C. *Proc. Natl. Acad. Sci. U. S. A.* **111**, 8895–8900 (2014).
